# Supplementary material for: Defining optimal implementation packages for delivering community-wide mass drug administration for soil-transmitted helminths with high coverage
Source: Springer Nature journal article supplement (doi:10.1186/s12913-022-08080-5), 2022-06-18
Supplement: MOESM1 [file 23179842]

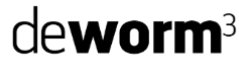

## Routine Workflow Tracking Worksheet: Community-Wide MDA

Country: \_\_\_\_\_ MDA Round: \_\_\_\_\_ Cluster ID \_\_\_\_\_ Submission Date: \_\_\_\_\_

**Instructions:** Please complete this form for every cluster that delivers community-wide MDA (20 clusters).

| Activity                                                                                                                                                                                                                                                                                                    | Completion Data                                                                                      |                                |                              |
|-------------------------------------------------------------------------------------------------------------------------------------------------------------------------------------------------------------------------------------------------------------------------------------------------------------|------------------------------------------------------------------------------------------------------|--------------------------------|------------------------------|
| <b>Drug Supply Chain</b>                                                                                                                                                                                                                                                                                    |                                                                                                      |                                |                              |
| Date albendazole arrived in cluster                                                                                                                                                                                                                                                                         | ____-____-____<br>DD-MM-YYYY                                                                         |                                |                              |
| First day that community drug distributors (CDDs) collected albendazole and total number of tablets collected                                                                                                                                                                                               | ____-____-____<br>DD-MM-YYYY                                                                         | _____ tablets                  |                              |
| Number of days of albendazole collection by CDDs                                                                                                                                                                                                                                                            | _____ days                                                                                           |                                |                              |
| Number of tablets returned                                                                                                                                                                                                                                                                                  | _____ tablets                                                                                        |                                |                              |
| <b>CDD Training</b>                                                                                                                                                                                                                                                                                         |                                                                                                      |                                |                              |
| Number of CDDs trained                                                                                                                                                                                                                                                                                      | _____/_____<br>(No. CDDs trained/Total no. of CDDs)                                                  |                                |                              |
| Date of CDD training<br><i>If training occurred on more than one day, write all dates</i>                                                                                                                                                                                                                   | ____-____-____<br>DD-MM-YYYY                                                                         | ____-____-____<br>DD-MM-YYYY   |                              |
|                                                                                                                                                                                                                                                                                                             | ____-____-____<br>DD-MM-YYYY                                                                         | ____-____-____<br>DD-MM-YYYY   |                              |
|                                                                                                                                                                                                                                                                                                             | ____-____-____<br>DD-MM-YYYY                                                                         | ____-____-____<br>DD-MM-YYYY   |                              |
| <b>Community Sensitization</b>                                                                                                                                                                                                                                                                              |                                                                                                      |                                |                              |
| For each sensitization activity:<br>1. Indicate which activities occurred in the cluster prior to this round of MDA (tick all that apply)<br>2. Indicate the quantity of the sensitization activity<br>3. Indicate the date when the activity started in the cluster                                        | <input type="checkbox"/> Community meetings                                                          | _____<br>No. of meetings       | ____-____-____<br>DD-MM-YYYY |
|                                                                                                                                                                                                                                                                                                             | <input type="checkbox"/> Public dialogue event<br><i>(e.g. drama or town crier)</i>                  | _____<br>No. of events         | ____-____-____<br>DD-MM-YYYY |
|                                                                                                                                                                                                                                                                                                             | <input type="checkbox"/> Distribution of printed IEC materials<br><i>(e.g. pamphlets or posters)</i> | _____<br>No. distributed       | ____-____-____<br>DD-MM-YYYY |
|                                                                                                                                                                                                                                                                                                             | <input type="checkbox"/> Door-to-door sensitization                                                  | _____<br>No. of houses visited | ____-____-____<br>DD-MM-YYYY |
|                                                                                                                                                                                                                                                                                                             | <input type="checkbox"/> Mass media (circle one):<br>Radio TV Newspaper Other                        | _____<br>No. of media spots    | ____-____-____<br>DD-MM-YYYY |
|                                                                                                                                                                                                                                                                                                             | <input type="checkbox"/> Other (please specify):<br>_____                                            | _____<br>Specify no.           | ____-____-____<br>DD-MM-YYYY |
| <b>MDA Delivery</b>                                                                                                                                                                                                                                                                                         |                                                                                                      |                                |                              |
| Dates of first and last days of MDA                                                                                                                                                                                                                                                                         | ____-____-____ TO ____-____-____<br>DD-MM-YYYY DD-MM-YYYY                                            |                                |                              |
| Dates of first and last days of MDA mop-up                                                                                                                                                                                                                                                                  | ____-____-____ TO ____-____-____<br>DD-MM-YYYY DD-MM-YYYY                                            |                                |                              |
| <b>Monitoring &amp; Evaluation</b>                                                                                                                                                                                                                                                                          |                                                                                                      |                                |                              |
| Please note any community activity that took place in the cluster <u>one month</u> prior to first day of MDA that may have affected treatment coverage. Include the date of the first and last days of the activity (DD-MM-YYYY).<br><i>(If you need more space, please write on the back of this page)</i> |                                                                                                      |                                |                              |

Please write your name on this worksheet to confirm accuracy of data:

**Implementation Science Supervisor:**

**Cluster Lead**

\_\_\_\_\_

\_\_\_\_\_
